# Supplementary material for: CO2 derived hydrogen bonding spacer: enhanced toughness, transparency, elongation and non-covalent interactions in epoxy-hydroxyurethane networks
Source: Royal Society of Chemistry journal article supplement (doi:10.1039/c7ta08243f), 2017-01-01
Supplement: c7ta08243f1.pdf [file c7ta08243f1.pdf]

## Supporting information

### **CO<sub>2</sub> Derived Hydrogen Bonding Spacer: Enhanced Toughness, Transparency, Elongation and Non-covalent Interactions in Epoxy-Hydroxyurethane Networks**

S. Anitha <sup>a</sup>, K.P. Vijayalakshmi <sup>b</sup>, G Unnikrishnan <sup>c</sup>, K.S. Santhosh Kumar <sup>\*a</sup>,

<sup>a</sup> Polymers and Special Chemicals Group, Vikram Sarabhai Space Centre  
Thiruvananthapuram – 695022, India

<sup>b</sup> Analytical, Spectroscopy and Ceramics Group, Vikram Sarabhai Space Centre  
Thiruvananthapuram – 695022, India

<sup>c</sup> Department of chemistry, National Institute of Technology, Calicut-673601

Email: [santhoshkshankar@yahoo.com](mailto:santhoshkshankar@yahoo.com)

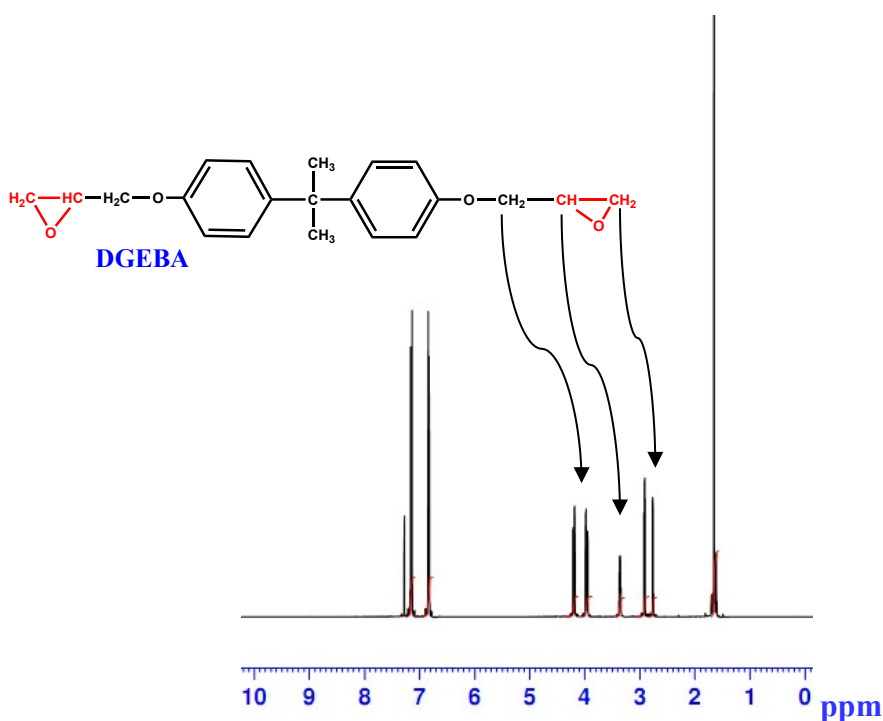

(a)

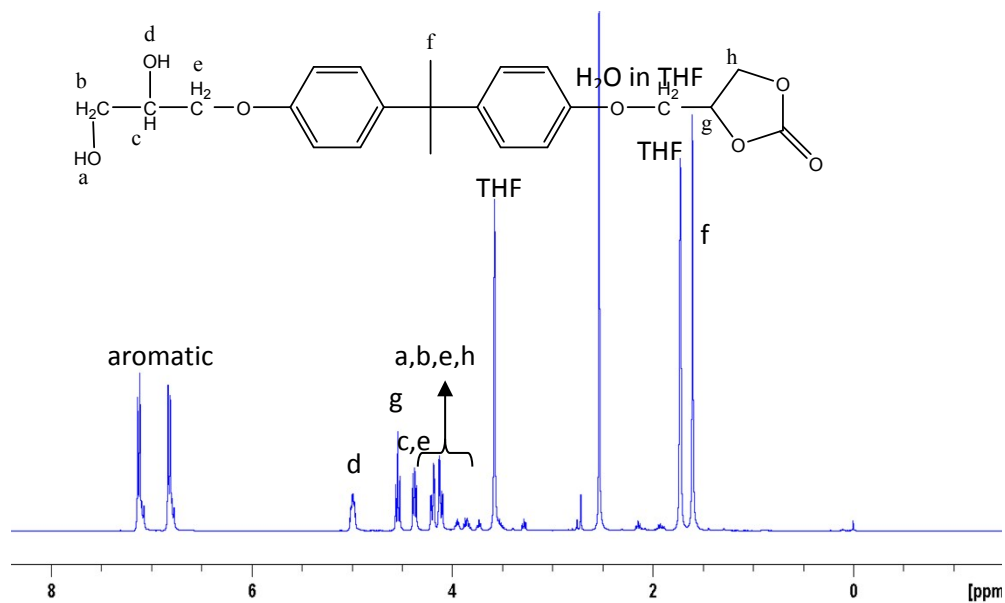

(b)

**SI 1  $^1\text{H}$  NMR of (a) DGEBA and (b) MCC.**

**SI 2 Theoretical hydroxyl number of MCC**

Theoretical -OH number = (functionality of MCC x 56100)/ molecular weight of MCC

Theoretical -OH number =  $(2 \times 56100)/388 = 290 \text{ mg KOH/g}$

**-OH number experimentally determined by titration = 322 kg KOH/g.**

i.e. number of functional groups  $\sim 2.1$

This closely matches with the MCC structure containing two hydroxyl groups.

**SI 3 Determination of CC content via proton NMR**

$$EW_{CC} = \frac{3 \times I_{CC} \times W_{\text{standard}}}{300 \times MW_{\text{standard}} \times W_{CC}}$$

where,  $I_{CC}$  is the Integration peak of  $-\text{CH}$  of MCC.

$W_{\text{standrad}}$  and  $W_{\text{cc}}$  are the weight of toluene (standard) and MCC respectively introduced into the NMR tube.

300 is the integral value of  $-\text{CH}_3$  of toluene.

$W_{\text{CC}}$  is the molecular weight of toluene.

Calculation:  $(3 \times 28.09 \times 7.00 \text{ mg}) / (300 \times 92 \times 10.2 \text{ mg}) = 0.0021 \text{ mol/g} = 0.00210 \text{ eq/g}$

$= 2.10 \text{ meq./g}$

No. CC ring equivalents in 1 kg of completely functionalized molecule (theoretical) = 4.6 eq/kg  
 $= 4.67 \text{ meq./g.}$

**% CC ring in MCC =  $2.10/4.67 = 45 \%$**

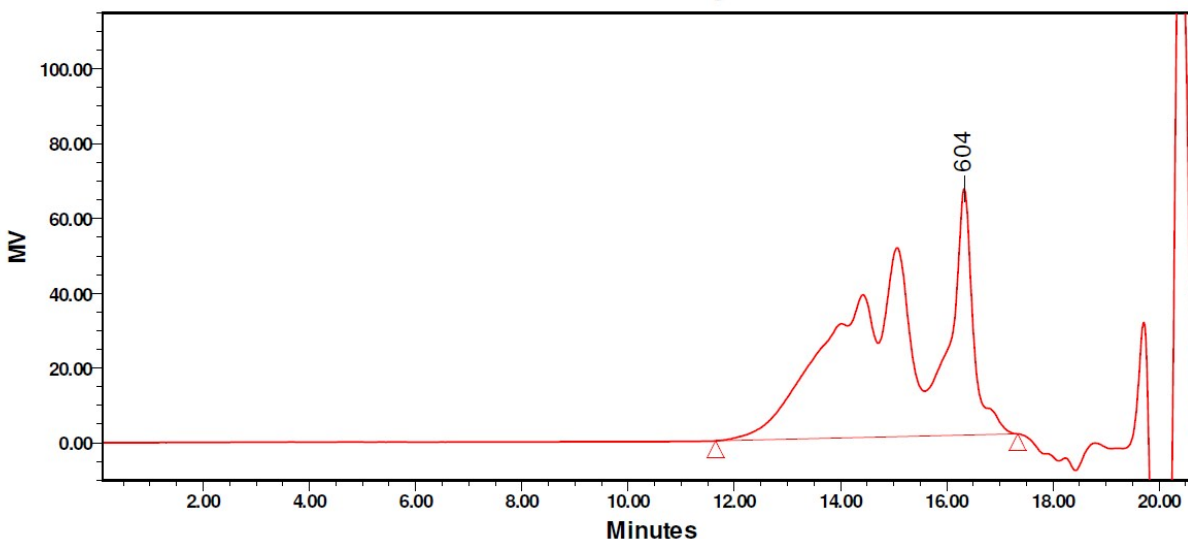

$M_n = 1100 \text{ g/mol}$

**SI 4 Gel permeation chromatography of MCC-Jeffamine adduct**

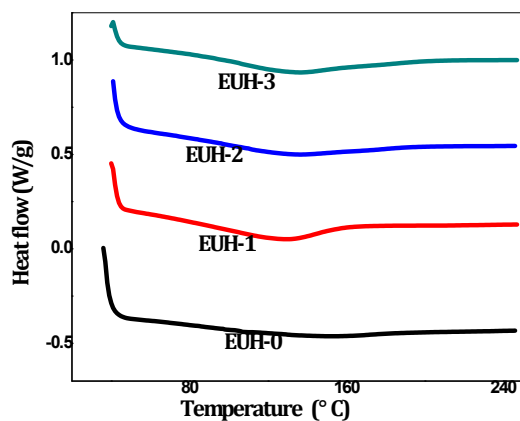

**SI 5 DSC traces show complete curing of EUH networks by heating at 100°C/2h (absence of exotherm)**

**SI 6 Swelling property of EUH networks**

| Networks | Swelling index (%) |      |         |
|----------|--------------------|------|---------|
|          | Methanol           | IPA  | Acetone |
| EUH-0    | 13.5               | 17.0 | 0.8     |
| EUH-1    | 11.2               | 15.2 | 0.9     |
| EUH-2    | 11.2               | 14.9 | 1.3     |
| EUH-3    | 11.4               | 14.2 | 2.0     |

**SI 7 Gel content of EUH networks**

| EUH networks | Gel content<br>( wt. %) |
|--------------|-------------------------|
| EUH-0        | 98                      |
| EUH-1        | 96                      |
| EUH-2        | 96                      |
| EUH-3        | 95                      |

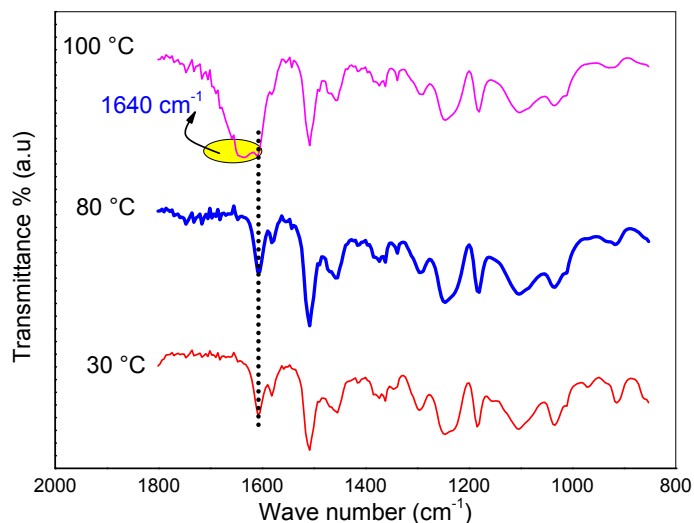

**SI 8 Formation of urethane linkages in DGEBA-MCC-Jeffmaine crosslinked network at enhanced temperature regime.**

**SI 9 Supporting information of DFT calculations**

**1. Model compound 1**

**E(RB3LYP) = -4517.99950681 A.U.**

**XYZ coordinates:**

|   |              |              |              |
|---|--------------|--------------|--------------|
| 6 | 2.241375000  | -3.199133000 | -1.438438000 |
| 6 | 0.698567000  | -3.167862000 | -1.492641000 |
| 6 | 2.673894000  | -4.569751000 | -0.876003000 |
| 6 | 2.726863000  | -2.965781000 | -2.893656000 |
| 8 | 0.151788000  | -3.398832000 | -0.195887000 |
| 6 | -1.203429000 | -3.021478000 | -0.042582000 |
| 6 | -2.201599000 | -4.053276000 | -0.611657000 |
| 6 | -2.036018000 | -5.429532000 | 0.031955000  |
| 7 | -3.567352000 | -3.568533000 | -0.434166000 |
| 8 | 2.398891000  | -0.820425000 | -0.968760000 |
| 6 | 2.555587000  | 0.183704000  | 0.025659000  |
| 6 | 2.486098000  | 1.587450000  | -0.601451000 |
| 6 | 1.826447000  | 2.529659000  | 0.417517000  |
| 7 | 3.834159000  | 2.064631000  | -0.992635000 |
| 6 | 4.577074000  | 1.149529000  | -1.873177000 |
| 6 | 3.895144000  | 3.455209000  | -1.449885000 |
| 6 | 6.097413000  | 1.281072000  | -1.677980000 |
| 8 | 6.449955000  | 1.200200000  | -0.298800000 |
| 6 | 6.876350000  | 0.171587000  | -2.377695000 |
| 8 | 6.598250000  | 0.256519000  | -3.770221000 |

|   |              |              |              |
|---|--------------|--------------|--------------|
| 6 | 8.131810000  | -1.603334000 | -4.208671000 |
| 6 | 8.701052000  | -2.450479000 | -5.166068000 |
| 6 | 8.381189000  | -2.356176000 | -6.521371000 |
| 6 | 7.453799000  | -1.371257000 | -6.901394000 |
| 6 | 6.876417000  | -0.520182000 | -5.968623000 |
| 6 | 7.213866000  | -0.629822000 | -4.611339000 |
| 6 | 9.007321000  | -3.271303000 | -7.548395000 |
| 6 | 4.472115000  | 4.401604000  | -0.388995000 |
| 8 | 5.781960000  | 3.938215000  | -0.053952000 |
| 6 | 4.560075000  | 5.839300000  | -0.889280000 |
| 8 | 5.163638000  | 6.584450000  | 0.166576000  |
| 6 | 5.133039000  | 8.624130000  | -1.192741000 |
| 6 | 5.450989000  | 9.984810000  | -1.271835000 |
| 6 | 6.058189000  | 10.664320000 | -0.214642000 |
| 6 | 6.345603000  | 9.930571000  | 0.948729000  |
| 6 | 6.039413000  | 8.579847000  | 1.048681000  |
| 6 | 5.429999000  | 7.917977000  | -0.025887000 |
| 6 | 6.392026000  | 12.135325000 | -0.306484000 |
| 6 | 4.238325000  | -3.006574000 | -3.146460000 |
| 6 | 5.870607000  | -5.186425000 | 0.906118000  |
| 7 | 5.863632000  | -3.943674000 | 1.711541000  |
| 6 | 6.833065000  | -5.131781000 | -0.291763000 |
| 6 | 5.079421000  | -4.059646000 | 2.944565000  |
| 6 | 4.660457000  | -2.694011000 | 3.538404000  |
| 8 | 4.079129000  | -1.857908000 | 2.565936000  |
| 6 | 3.638627000  | -2.917891000 | 4.645089000  |
| 8 | 3.544324000  | -1.727189000 | 5.417189000  |
| 6 | 7.178103000  | -3.336098000 | 1.950792000  |
| 6 | 1.792026000  | -2.729756000 | 6.806851000  |
| 6 | 0.905122000  | -2.557986000 | 7.876101000  |
| 6 | 0.833934000  | -1.363141000 | 8.593255000  |
| 6 | 1.693224000  | -0.321572000 | 8.202552000  |
| 6 | 2.579977000  | -0.469983000 | 7.145408000  |
| 6 | 2.637860000  | -1.680089000 | 6.435468000  |
| 6 | -0.126293000 | -1.186525000 | 9.747037000  |
| 6 | 7.464192000  | -2.118147000 | 1.057993000  |
| 8 | 6.513946000  | -1.112322000 | 1.377161000  |
| 6 | 8.886002000  | -1.610393000 | 1.298620000  |
| 6 | 11.296846000 | -0.043146000 | 1.388417000  |
| 6 | 12.352770000 | 0.863426000  | 1.533493000  |
| 6 | 12.294203000 | 2.153678000  | 1.003227000  |
| 6 | 11.123117000 | 2.523160000  | 0.320054000  |
| 6 | 10.060374000 | 1.641663000  | 0.168928000  |
| 6 | 10.147638000 | 0.345756000  | 0.696767000  |
| 6 | 13.444449000 | 3.122733000  | 1.152343000  |
| 8 | 9.068524000  | -0.468236000 | 0.471073000  |
| 8 | 4.055663000  | -4.551604000 | -0.549896000 |

|   |              |              |              |
|---|--------------|--------------|--------------|
| 6 | 4.470023000  | -5.538713000 | 0.366736000  |
| 6 | 2.742452000  | -2.114369000 | -0.469842000 |
| 1 | 0.377809000  | -2.183877000 | -1.859869000 |
| 1 | 0.337560000  | -3.929253000 | -2.202359000 |
| 1 | 2.085635000  | -4.786225000 | 0.026771000  |
| 1 | 2.459413000  | -5.363184000 | -1.613664000 |
| 1 | 2.342649000  | -1.991445000 | -3.217709000 |
| 1 | 2.243909000  | -3.717374000 | -3.535345000 |
| 1 | -1.369451000 | -2.915987000 | 1.037321000  |
| 1 | -1.391651000 | -2.045780000 | -0.515215000 |
| 1 | -2.051457000 | -4.128358000 | -1.692438000 |
| 1 | -2.698217000 | -6.165008000 | -0.435588000 |
| 1 | -1.000928000 | -5.766364000 | -0.070123000 |
| 1 | -2.266136000 | -5.391410000 | 1.105359000  |
| 1 | -4.013274000 | -3.659467000 | 0.468652000  |
| 1 | 1.762459000  | 0.066642000  | 0.779033000  |
| 1 | 3.515601000  | 0.074341000  | 0.550640000  |
| 1 | 1.823592000  | 1.516646000  | -1.485047000 |
| 1 | 1.713607000  | 3.550813000  | 0.043028000  |
| 1 | 0.823211000  | 2.161859000  | 0.656217000  |
| 1 | 2.407130000  | 2.565513000  | 1.346696000  |
| 1 | 4.282869000  | 0.128075000  | -1.634982000 |
| 1 | 4.335212000  | 1.303833000  | -2.938434000 |
| 1 | 2.907958000  | 3.827750000  | -1.765202000 |
| 1 | 4.539764000  | 3.516606000  | -2.335314000 |
| 1 | 6.444753000  | 2.244358000  | -2.076366000 |
| 1 | 6.044486000  | 1.991013000  | 0.112991000  |
| 1 | 7.948093000  | 0.297540000  | -2.181365000 |
| 1 | 6.569214000  | -0.807643000 | -1.982396000 |
| 1 | 8.411273000  | -1.711391000 | -3.166886000 |
| 1 | 9.414336000  | -3.203403000 | -4.837568000 |
| 1 | 7.178782000  | -1.270734000 | -7.949463000 |
| 1 | 6.159319000  | 0.239201000  | -6.265526000 |
| 1 | 9.655043000  | -4.016200000 | -7.074750000 |
| 1 | 8.246849000  | -3.811991000 | -8.125928000 |
| 1 | 9.618993000  | -2.712803000 | -8.268921000 |
| 1 | 3.839617000  | 4.386701000  | 0.508303000  |
| 1 | 6.172649000  | 4.612126000  | 0.527422000  |
| 1 | 5.183196000  | 5.890009000  | -1.793028000 |
| 1 | 3.562847000  | 6.239124000  | -1.121396000 |
| 1 | 4.660738000  | 8.137803000  | -2.038794000 |
| 1 | 5.215128000  | 10.522721000 | -2.187246000 |
| 1 | 6.818981000  | 10.428042000 | 1.792592000  |
| 1 | 6.262556000  | 8.017269000  | 1.950291000  |
| 1 | 6.162169000  | 12.534428000 | -1.299546000 |
| 1 | 5.825050000  | 12.724061000 | 0.426088000  |
| 1 | 7.455696000  | 12.320301000 | -0.111722000 |

|   |               |              |              |
|---|---------------|--------------|--------------|
| 1 | 4.449579000   | -2.777325000 | -4.196967000 |
| 1 | 4.664878000   | -3.985889000 | -2.915455000 |
| 1 | 4.766271000   | -2.265683000 | -2.537895000 |
| 1 | 6.174452000   | -6.048134000 | 1.537832000  |
| 1 | 6.769917000   | -6.078390000 | -0.839354000 |
| 1 | 7.877036000   | -5.001944000 | 0.004034000  |
| 1 | 6.552962000   | -4.328363000 | -0.976866000 |
| 1 | 4.159087000   | -4.601220000 | 2.715500000  |
| 1 | 5.611750000   | -4.645809000 | 3.721860000  |
| 1 | 5.532704000   | -2.201378000 | 3.996837000  |
| 1 | 4.809066000   | -1.617135000 | 1.956257000  |
| 1 | 2.667540000   | -3.157301000 | 4.190004000  |
| 1 | 3.943296000   | -3.758032000 | 5.287674000  |
| 1 | 7.996471000   | -4.064447000 | 1.851569000  |
| 1 | 7.222195000   | -2.984030000 | 2.986993000  |
| 1 | 1.811006000   | -3.676248000 | 6.278617000  |
| 1 | 0.253836000   | -3.384961000 | 8.151711000  |
| 1 | 1.664563000   | 0.625064000  | 8.738811000  |
| 1 | 3.241112000   | 0.337012000  | 6.844530000  |
| 1 | -0.726631000  | -2.088264000 | 9.906510000  |
| 1 | 0.402009000   | -0.971239000 | 10.684890000 |
| 1 | -0.819827000  | -0.353756000 | 9.572980000  |
| 1 | 7.373509000   | -2.404837000 | 0.000693000  |
| 1 | 6.614986000   | -0.345495000 | 0.768581000  |
| 1 | 9.013478000   | -1.332443000 | 2.354157000  |
| 1 | 9.619277000   | -2.392820000 | 1.049771000  |
| 1 | 11.384520000  | -1.039569000 | 1.808102000  |
| 1 | 13.242845000  | 0.547962000  | 2.073690000  |
| 1 | 11.039704000  | 3.526732000  | -0.092650000 |
| 1 | 9.139416000   | 1.934492000  | -0.325282000 |
| 1 | 14.226681000  | 2.716021000  | 1.801577000  |
| 1 | 13.906924000  | 3.353196000  | 0.183616000  |
| 1 | 13.116214000  | 4.076219000  | 1.584665000  |
| 1 | 3.731566000   | -5.636458000 | 1.175139000  |
| 1 | 4.535520000   | -6.528813000 | -0.118292000 |
| 1 | 2.289316000   | -2.270587000 | 0.516797000  |
| 1 | 3.827271000   | -2.188019000 | -0.338328000 |
| 6 | -4.208865000  | -2.820062000 | -1.372899000 |
| 8 | -3.778540000  | -2.547369000 | -2.480282000 |
| 8 | -5.426116000  | -2.425565000 | -0.889792000 |
| 6 | -6.254665000  | -1.657438000 | -1.787731000 |
| 6 | -6.966648000  | -0.594605000 | -0.958092000 |
| 6 | -7.181616000  | -2.625451000 | -2.537468000 |
| 8 | -8.061406000  | -1.938588000 | -3.416047000 |
| 8 | -7.848276000  | -1.153034000 | 0.019049000  |
| 6 | -9.928985000  | -0.552988000 | -1.160604000 |
| 6 | -11.302420000 | -0.774967000 | -1.288370000 |



|   |               |              |              |
|---|---------------|--------------|--------------|
| 6 | -11.985959000 | -1.716397000 | -0.507447000 |
| 6 | -11.226615000 | -2.430695000 | 0.431136000  |
| 6 | -9.855632000  | -2.229018000 | 0.571198000  |
| 6 | -9.187507000  | -1.292956000 | -0.226253000 |
| 6 | -13.488100000 | -1.967420000 | -0.746993000 |
| 6 | -13.621249000 | -2.747379000 | -2.077825000 |
| 6 | -14.119921000 | -2.837892000 | 0.366611000  |
| 6 | -15.159745000 | -0.286079000 | -1.790978000 |
| 6 | -15.875009000 | 0.908460000  | -1.757539000 |
| 6 | -15.702285000 | 1.802873000  | -0.697688000 |
| 6 | -14.797825000 | 1.490738000  | 0.322929000  |
| 6 | -14.090064000 | 0.289743000  | 0.269068000  |
| 6 | -14.250743000 | -0.627480000 | -0.778579000 |
| 8 | -16.448038000 | 2.953035000  | -0.749553000 |
| 6 | -16.358784000 | 3.887589000  | 0.327727000  |
| 6 | -17.398310000 | 4.966467000  | 0.038055000  |
| 8 | -18.677643000 | 4.369898000  | -0.164253000 |
| 6 | -17.569796000 | 5.929734000  | 1.212744000  |
| 8 | -18.044616000 | 5.254739000  | 2.364962000  |
| 1 | -5.611392000  | -1.148374000 | -2.512280000 |
| 1 | -6.222886000  | -0.026648000 | -0.392376000 |
| 1 | -7.481000000  | 0.095364000  | -1.631360000 |
| 1 | -6.556743000  | -3.284223000 | -3.148459000 |
| 1 | -7.722554000  | -3.247029000 | -1.812407000 |
| 1 | -8.879915000  | -1.750442000 | -2.928385000 |
| 1 | -9.466684000  | 0.221038000  | -1.764081000 |
| 1 | -11.855715000 | -0.177412000 | -2.008035000 |
| 1 | -11.699729000 | -3.168473000 | 1.070329000  |
| 1 | -9.279799000  | -2.791188000 | 1.299875000  |
| 1 | -14.661367000 | -3.030661000 | -2.275769000 |
| 1 | -13.253736000 | -2.165961000 | -2.929774000 |
| 1 | -13.030750000 | -3.667826000 | -2.023853000 |
| 1 | -15.194184000 | -2.942474000 | 0.183585000  |
| 1 | -13.993483000 | -2.388456000 | 1.356898000  |
| 1 | -13.686581000 | -3.844491000 | 0.386044000  |
| 1 | -15.323351000 | -0.954725000 | -2.629216000 |
| 1 | -16.572762000 | 1.163131000  | -2.549749000 |
| 1 | -14.634268000 | 2.168364000  | 1.153273000  |
| 1 | -13.382978000 | 0.071519000  | 1.065058000  |
| 1 | -16.588451000 | 3.399529000  | 1.281806000  |
| 1 | -15.350425000 | 4.320961000  | 0.378809000  |
| 1 | -17.090430000 | 5.529341000  | -0.858077000 |
| 1 | -18.524543000 | 3.578853000  | -0.708317000 |
| 1 | -16.611384000 | 6.389316000  | 1.477696000  |
| 1 | -18.257522000 | 6.732720000  | 0.905297000  |
| 1 | -18.812092000 | 4.742406000  | 2.055923000  |

## 2. Model compound 2 (double chain)

E(RB3LYP) = -9036.01918729 A.U.

### XYZ coordinates:

|   |               |             |              |
|---|---------------|-------------|--------------|
| 6 | 0.152236000   | 2.319522000 | -0.129942000 |
| 8 | 0.090519000   | 2.569808000 | -1.329268000 |
| 8 | 0.032976000   | 3.254565000 | 0.855872000  |
| 6 | -0.074368000  | 4.657329000 | 0.509440000  |
| 6 | -1.344601000  | 4.945860000 | -0.310393000 |
| 6 | 1.202990000   | 5.211592000 | -0.142170000 |
| 8 | 1.239889000   | 6.625874000 | -0.044051000 |
| 8 | -1.657337000  | 6.342329000 | -0.280989000 |
| 6 | -2.842957000  | 6.113826000 | 1.863830000  |
| 6 | -3.713820000  | 6.692994000 | 2.785600000  |
| 6 | -4.242436000  | 7.978864000 | 2.610007000  |
| 6 | -3.839715000  | 8.681546000 | 1.465105000  |
| 6 | -2.971615000  | 8.119675000 | 0.529917000  |
| 6 | -2.477338000  | 6.827125000 | 0.717624000  |
| 6 | -5.194462000  | 8.562761000 | 3.674395000  |
| 6 | -4.338183000  | 8.970782000 | 4.897239000  |
| 6 | -5.928274000  | 9.828987000 | 3.170832000  |
| 6 | -6.602496000  | 7.174103000 | 5.354744000  |
| 6 | -7.568621000  | 6.209796000 | 5.637417000  |
| 6 | -8.226350000  | 5.546041000 | 4.598510000  |
| 6 | -7.921725000  | 5.879305000 | 3.273665000  |
| 6 | -6.955515000  | 6.849194000 | 3.012870000  |
| 6 | -6.261948000  | 7.509324000 | 4.036415000  |
| 8 | -9.142865000  | 4.592087000 | 4.962290000  |
| 6 | -9.645666000  | 3.716390000 | 3.946820000  |
| 6 | -10.641532000 | 2.785377000 | 4.628975000  |
| 8 | -11.618197000 | 3.550798000 | 5.337667000  |
| 6 | -11.427713000 | 1.947682000 | 3.619777000  |
| 8 | -12.213963000 | 2.786231000 | 2.778856000  |
| 1 | -0.169846000  | 5.138803000 | 1.485919000  |
| 1 | -1.184125000  | 4.703196000 | -1.361352000 |
| 1 | -2.187501000  | 4.350660000 | 0.057774000  |
| 1 | 2.072208000   | 4.836677000 | 0.407978000  |
| 1 | 1.280381000   | 4.865006000 | -1.181707000 |
| 1 | 0.403798000   | 6.962920000 | -0.408673000 |
| 1 | -2.475269000  | 5.112687000 | 2.055405000  |
| 1 | -4.002651000  | 6.108313000 | 3.654141000  |
| 1 | -4.214643000  | 9.681727000 | 1.275105000  |
| 1 | -2.685564000  | 8.666157000 | -0.363770000 |
| 1 | -4.944242000  | 9.462697000 | 5.666785000  |
| 1 | -3.839517000  | 8.107329000 | 5.349509000  |
| 1 | -3.562914000  | 9.677141000 | 4.582776000  |

|   |               |               |              |
|---|---------------|---------------|--------------|
| 1 | -6.634097000  | 10.171211000  | 3.934711000  |
| 1 | -6.496686000  | 9.632960000   | 2.255682000  |
| 1 | -5.228772000  | 10.649604000  | 2.973777000  |
| 1 | -6.101923000  | 7.653792000   | 6.189207000  |
| 1 | -7.808929000  | 5.945405000   | 6.662862000  |
| 1 | -8.417840000  | 5.388142000   | 2.444713000  |
| 1 | -6.718713000  | 7.076624000   | 1.976999000  |
| 1 | -10.165651000 | 4.289272000   | 3.170579000  |
| 1 | -8.819695000  | 3.151197000   | 3.497470000  |
| 1 | -10.101393000 | 2.119367000   | 5.320078000  |
| 1 | -11.133141000 | 4.275128000   | 5.768302000  |
| 1 | -10.765169000 | 1.372779000   | 2.966587000  |
| 1 | -12.063891000 | 1.241221000   | 4.173152000  |
| 1 | -12.672584000 | 3.390579000   | 3.389448000  |
| 6 | -6.235361000  | 0.560849000   | -4.249042000 |
| 6 | -4.703563000  | 0.525279000   | -4.448253000 |
| 6 | -6.693204000  | 2.035526000   | -4.321045000 |
| 6 | -6.842505000  | -0.303100000  | -5.386104000 |
| 8 | -4.063134000  | 1.347014000   | -3.475815000 |
| 6 | -2.671977000  | 1.130908000   | -3.325754000 |
| 6 | -1.815496000  | 1.774645000   | -4.432920000 |
| 6 | -2.090716000  | 3.274838000   | -4.581818000 |
| 7 | -0.412370000  | 1.500812000   | -4.133128000 |
| 8 | -6.334197000  | -1.382763000  | -2.779131000 |
| 6 | -6.283811000  | -1.841228000  | -1.430816000 |
| 6 | -6.520435000  | -3.359019000  | -1.351867000 |
| 6 | -5.696208000  | -3.901845000  | -0.172780000 |
| 7 | -7.959556000  | -3.684710000  | -1.194338000 |
| 6 | -8.839083000  | -3.068445000  | -2.200403000 |
| 6 | -8.234490000  | -5.114537000  | -1.016448000 |
| 6 | -10.296051000 | -2.957935000  | -1.720285000 |
| 8 | -10.381335000 | -2.284518000  | -0.468236000 |
| 6 | -11.165437000 | -2.158421000  | -2.686583000 |
| 8 | -11.204630000 | -2.857415000  | -3.924316000 |
| 6 | -12.801503000 | -1.227325000  | -4.818832000 |
| 6 | -13.546607000 | -0.805332000  | -5.925761000 |
| 6 | -13.486082000 | -1.465005000  | -7.154281000 |
| 6 | -12.642771000 | -2.585013000  | -7.247495000 |
| 6 | -11.894611000 | -3.021798000  | -6.162501000 |
| 6 | -11.969529000 | -2.343932000  | -4.936700000 |
| 6 | -14.288681000 | -0.995415000  | -8.345709000 |
| 6 | -8.607794000  | -5.468400000  | 0.428612000  |
| 8 | -9.781908000  | -4.730640000  | 0.774992000  |
| 6 | -8.885716000  | -6.958314000  | 0.600631000  |
| 8 | -9.299685000  | -7.125947000  | 1.955634000  |
| 6 | -9.704486000  | -9.515500000  | 1.588050000  |
| 6 | -10.149890000 | -10.726087000 | 2.131186000  |

|   |               |               |              |
|---|---------------|---------------|--------------|
| 6 | -10.605140000 | -10.822102000 | 3.447070000  |
| 6 | -10.600217000 | -9.650515000  | 4.222800000  |
| 6 | -10.163202000 | -8.438882000  | 3.704095000  |
| 6 | -9.713613000  | -8.365425000  | 2.378779000  |
| 6 | -11.090817000 | -12.131796000 | 4.023606000  |
| 6 | -8.369399000  | -0.428919000  | -5.439231000 |
| 6 | -9.761527000  | 3.397991000   | -2.747258000 |
| 7 | -9.601066000  | 2.680769000   | -1.462184000 |
| 6 | -10.864043000 | 2.767677000   | -3.614818000 |
| 6 | -8.426129000  | 3.084851000   | -0.689621000 |
| 6 | -8.087963000  | 2.150689000   | 0.494484000  |
| 8 | -8.020025000  | 0.797214000   | 0.113449000  |
| 6 | -6.724798000  | 2.529956000   | 1.063390000  |
| 8 | -6.623068000  | 1.987738000   | 2.379313000  |
| 6 | -10.848561000 | 2.630948000   | -0.680238000 |
| 6 | -4.205286000  | 2.396183000   | 2.415542000  |
| 6 | -3.003073000  | 2.250703000   | 3.118857000  |
| 6 | -2.951816000  | 1.652796000   | 4.379199000  |
| 6 | -4.161813000  | 1.192385000   | 4.926038000  |
| 6 | -5.362779000  | 1.318968000   | 4.241656000  |
| 6 | -5.395958000  | 1.921350000   | 2.974078000  |
| 6 | -1.650130000  | 1.499105000   | 5.131908000  |
| 6 | -11.488291000 | 1.232508000   | -0.681676000 |
| 8 | -10.718342000 | 0.396683000   | 0.182143000  |
| 6 | -12.942381000 | 1.258808000   | -0.222516000 |
| 6 | -15.583857000 | 0.580493000   | 0.614571000  |
| 6 | -16.858014000 | 0.171448000   | 1.023958000  |
| 6 | -17.290278000 | -1.148735000  | 0.888795000  |
| 6 | -16.392006000 | -2.069266000  | 0.322938000  |
| 6 | -15.122841000 | -1.685633000  | -0.088737000 |
| 6 | -14.708459000 | -0.352543000  | 0.052466000  |
| 6 | -18.669039000 | -1.580689000  | 1.332216000  |
| 8 | -13.447286000 | -0.067526000  | -0.393788000 |
| 8 | -8.027905000  | 2.150930000   | -3.850686000 |
| 6 | -8.467633000  | 3.462005000   | -3.577342000 |
| 6 | -6.577547000  | 0.023503000   | -2.847337000 |
| 1 | -4.359568000  | -0.513369000  | -4.341618000 |
| 1 | -4.450348000  | 0.864810000   | -5.464971000 |
| 1 | -6.029573000  | 2.653374000   | -3.699404000 |
| 1 | -6.613296000  | 2.400005000   | -5.360224000 |
| 1 | -6.410940000  | -1.307693000  | -5.305280000 |
| 1 | -6.490347000  | 0.110200000   | -6.342726000 |
| 1 | -2.402334000  | 1.578014000   | -2.361132000 |
| 1 | -2.448880000  | 0.053704000   | -3.277801000 |
| 1 | -2.018374000  | 1.277320000   | -5.385436000 |
| 1 | -1.506074000  | 3.688833000   | -5.409479000 |
| 1 | -3.152645000  | 3.454131000   | -4.776386000 |

|   |               |               |              |
|---|---------------|---------------|--------------|
| 1 | -1.818217000  | 3.810857000   | -3.664240000 |
| 1 | -0.040566000  | 1.818057000   | -3.240400000 |
| 1 | -5.290938000  | -1.604277000  | -1.017372000 |
| 1 | -7.022685000  | -1.321451000  | -0.807088000 |
| 1 | -6.121733000  | -3.800633000  | -2.285596000 |
| 1 | -5.779704000  | -4.985870000  | -0.056217000 |
| 1 | -4.636596000  | -3.676610000  | -0.332568000 |
| 1 | -6.009684000  | -3.430953000  | 0.766354000  |
| 1 | -8.476373000  | -2.061482000  | -2.400181000 |
| 1 | -8.820643000  | -3.609444000  | -3.162579000 |
| 1 | -7.379691000  | -5.734481000  | -1.327895000 |
| 1 | -9.071782000  | -5.411406000  | -1.659558000 |
| 1 | -10.741815000 | -3.957081000  | -1.620757000 |
| 1 | -9.969268000  | -2.889587000  | 0.181176000  |
| 1 | -12.169625000 | -2.054477000  | -2.256491000 |
| 1 | -10.746745000 | -1.151492000  | -2.830252000 |
| 1 | -12.888287000 | -0.688767000  | -3.881888000 |
| 1 | -14.192284000 | 0.063525000   | -5.817915000 |
| 1 | -12.571247000 | -3.124652000  | -8.189793000 |
| 1 | -11.244057000 | -3.887896000  | -6.237973000 |
| 1 | -14.959037000 | -0.173205000  | -8.074655000 |
| 1 | -13.639900000 | -0.638253000  | -9.156289000 |
| 1 | -14.904680000 | -1.802619000  | -8.761468000 |
| 1 | -7.788718000  | -5.187134000  | 1.103761000  |
| 1 | -10.078626000 | -5.073029000  | 1.635053000  |
| 1 | -9.686054000  | -7.277532000  | -0.081293000 |
| 1 | -7.985023000  | -7.554069000  | 0.396337000  |
| 1 | -9.357326000  | -9.488175000  | 0.561337000  |
| 1 | -10.138633000 | -11.614423000 | 1.503720000  |
| 1 | -10.946499000 | -9.689059000  | 5.253458000  |
| 1 | -10.160664000 | -7.536231000  | 4.307775000  |
| 1 | -10.986173000 | -12.947928000 | 3.301647000  |
| 1 | -10.528210000 | -12.409921000 | 4.923581000  |
| 1 | -12.148654000 | -12.077888000 | 4.311039000  |
| 1 | -8.662303000  | -1.065009000  | -6.282519000 |
| 1 | -8.855996000  | 0.542023000   | -5.558435000 |
| 1 | -8.766540000  | -0.891869000  | -4.530993000 |
| 1 | -10.041014000 | 4.457397000   | -2.560236000 |
| 1 | -10.962847000 | 3.332189000   | -4.548755000 |
| 1 | -11.842357000 | 2.779824000   | -3.126979000 |
| 1 | -10.608112000 | 1.734540000   | -3.863684000 |
| 1 | -7.561645000  | 3.054514000   | -1.355455000 |
| 1 | -8.508964000  | 4.124148000   | -0.304216000 |
| 1 | -8.832858000  | 2.283042000   | 1.293454000  |
| 1 | -8.952453000  | 0.512670000   | -0.017290000 |
| 1 | -5.954874000  | 2.098956000   | 0.411713000  |
| 1 | -6.588873000  | 3.620399000   | 1.104137000  |

|   |               |              |              |
|---|---------------|--------------|--------------|
| 1 | -11.574348000 | 3.366361000  | -1.055997000 |
| 1 | -10.665376000 | 2.908736000  | 0.362928000  |
| 1 | -4.199433000  | 2.878281000  | 1.444760000  |
| 1 | -2.083311000  | 2.610628000  | 2.660665000  |
| 1 | -4.160627000  | 0.722123000  | 5.907381000  |
| 1 | -6.293245000  | 0.953886000  | 4.665700000  |
| 1 | -0.817495000  | 1.955282000  | 4.585589000  |
| 1 | -1.694643000  | 1.975840000  | 6.119217000  |
| 1 | -1.398821000  | 0.443741000  | 5.299853000  |
| 1 | -11.456794000 | 0.836479000  | -1.704298000 |
| 1 | -10.864870000 | -0.549943000 | -0.038394000 |
| 1 | -13.000002000 | 1.567137000  | 0.827833000  |
| 1 | -13.528903000 | 1.961378000  | -0.834355000 |
| 1 | -15.289642000 | 1.615957000  | 0.741268000  |
| 1 | -17.527534000 | 0.909816000  | 1.460229000  |
| 1 | -16.693884000 | -3.108001000 | 0.203882000  |
| 1 | -14.430725000 | -2.402780000 | -0.519923000 |
| 1 | -19.233045000 | -0.741314000 | 1.751937000  |
| 1 | -19.253804000 | -1.987750000 | 0.497273000  |
| 1 | -18.620707000 | -2.363589000 | 2.100026000  |
| 1 | -7.681751000  | 4.035143000  | -3.063321000 |
| 1 | -8.691454000  | 4.008053000  | -4.509707000 |
| 1 | -5.954066000  | 0.547416000  | -2.110398000 |
| 1 | -7.620267000  | 0.233446000  | -2.593051000 |
| 7 | 0.346873000   | 1.101670000  | 0.425683000  |
| 1 | 0.291692000   | 1.055296000  | 1.435033000  |
| 6 | 4.030359000   | -3.035480000 | -1.124009000 |
| 6 | 2.764750000   | -2.211271000 | -1.468128000 |
| 6 | 3.580752000   | -4.485470000 | -0.850020000 |
| 6 | 4.969435000   | -2.909666000 | -2.351716000 |
| 8 | 1.814841000   | -2.188168000 | -0.401376000 |
| 6 | 1.642400000   | -0.944517000 | 0.252950000  |
| 6 | 0.452879000   | -0.151174000 | -0.323897000 |
| 6 | -0.849992000  | -0.954115000 | -0.278450000 |
| 8 | 5.021136000   | -1.133775000 | 0.033561000  |
| 6 | 5.439593000   | -0.575942000 | 1.275272000  |
| 6 | 6.091555000   | 0.802529000  | 1.063364000  |
| 6 | 5.731424000   | 1.686584000  | 2.267569000  |
| 7 | 7.557200000   | 0.669650000  | 0.901168000  |
| 6 | 7.976367000   | -0.255133000 | -0.162617000 |
| 6 | 8.310725000   | 1.924830000  | 0.885665000  |
| 6 | 9.311688000   | -0.936519000 | 0.181285000  |
| 8 | 9.271810000   | -1.506494000 | 1.486979000  |
| 6 | 9.658467000   | -2.074938000 | -0.772925000 |
| 8 | 9.814348000   | -1.517636000 | -2.075355000 |
| 6 | 10.427147000  | -3.721445000 | -2.956354000 |
| 6 | 10.775279000  | -4.477245000 | -4.081711000 |

|   |              |              |              |
|---|--------------|--------------|--------------|
| 6 | 10.862181000 | -3.912226000 | -5.355260000 |
| 6 | 10.586447000 | -2.539650000 | -5.475438000 |
| 6 | 10.238096000 | -1.769136000 | -4.373641000 |
| 6 | 10.156281000 | -2.357975000 | -3.102432000 |
| 6 | 11.231762000 | -4.739120000 | -6.565248000 |
| 6 | 9.033397000  | 2.198473000  | 2.211462000  |
| 8 | 9.895360000  | 1.090033000  | 2.474343000  |
| 6 | 9.858417000  | 3.479799000  | 2.157492000  |
| 8 | 10.530801000 | 3.566107000  | 3.412142000  |
| 6 | 11.671387000 | 5.619083000  | 2.709570000  |
| 6 | 12.581613000 | 6.627929000  | 3.044920000  |
| 6 | 13.235041000 | 6.652994000  | 4.278072000  |
| 6 | 12.948954000 | 5.619223000  | 5.185548000  |
| 6 | 12.049757000 | 4.608058000  | 4.873530000  |
| 6 | 11.405117000 | 4.603542000  | 3.629258000  |
| 6 | 14.209589000 | 7.751300000  | 4.635356000  |
| 6 | 6.242918000  | -3.763580000 | -2.352270000 |
| 6 | 5.457422000  | -6.947089000 | 1.218477000  |
| 7 | 5.998692000  | -6.023253000 | 2.242292000  |
| 6 | 6.476776000  | -7.374220000 | 0.150991000  |
| 6 | 5.127552000  | -5.910496000 | 3.413719000  |
| 6 | 5.306942000  | -4.580899000 | 4.184710000  |
| 8 | 5.287710000  | -3.470227000 | 3.316963000  |
| 6 | 4.177508000  | -4.421645000 | 5.192351000  |
| 8 | 4.542292000  | -3.407731000 | 6.120395000  |
| 6 | 7.411418000  | -6.173760000 | 2.607003000  |
| 6 | 2.391172000  | -3.640192000 | 7.272466000  |
| 6 | 1.569417000  | -3.199417000 | 8.316519000  |
| 6 | 1.967874000  | -2.192643000 | 9.196673000  |
| 6 | 3.238841000  | -1.625631000 | 8.998809000  |
| 6 | 4.069610000  | -2.047026000 | 7.970117000  |
| 6 | 3.652037000  | -3.062477000 | 7.094769000  |
| 6 | 1.075816000  | -1.725578000 | 10.323809000 |
| 6 | 8.326659000  | -5.121155000 | 1.962391000  |
| 8 | 7.964967000  | -3.852844000 | 2.491091000  |
| 6 | 9.794176000  | -5.441006000 | 2.251912000  |
| 6 | 12.694718000 | -5.479455000 | 2.223151000  |
| 6 | 14.084706000 | -5.349465000 | 2.310887000  |
| 6 | 14.730712000 | -4.136711000 | 2.051864000  |
| 6 | 13.933269000 | -3.031432000 | 1.715490000  |
| 6 | 12.548926000 | -3.137470000 | 1.637360000  |
| 6 | 11.923782000 | -4.368917000 | 1.868811000  |
| 6 | 16.233155000 | -4.000096000 | 2.152612000  |
| 8 | 10.563690000 | -4.392586000 | 1.680734000  |
| 8 | 4.642525000  | -5.231553000 | -0.271826000 |
| 6 | 4.235989000  | -6.337645000 | 0.502978000  |
| 6 | 4.674103000  | -2.512340000 | 0.169693000  |

|   |              |              |              |
|---|--------------|--------------|--------------|
| 1 | 3.060084000  | -1.192933000 | -1.745929000 |
| 1 | 2.265335000  | -2.665360000 | -2.335206000 |
| 1 | 2.725516000  | -4.459717000 | -0.159377000 |
| 1 | 3.241074000  | -4.961863000 | -1.786219000 |
| 1 | 5.244270000  | -1.852654000 | -2.450589000 |
| 1 | 4.385099000  | -3.160589000 | -3.250288000 |
| 1 | 1.444537000  | -1.170371000 | 1.311144000  |
| 1 | 2.556826000  | -0.341881000 | 0.200015000  |
| 1 | 0.680403000  | 0.126631000  | -1.357222000 |
| 1 | -1.669025000 | -0.397541000 | -0.743776000 |
| 1 | -0.719557000 | -1.902767000 | -0.806554000 |
| 1 | -1.133300000 | -1.178887000 | 0.757685000  |
| 1 | 4.566133000  | -0.485095000 | 1.937776000  |
| 1 | 6.156856000  | -1.237739000 | 1.780545000  |
| 1 | 5.635713000  | 1.247105000  | 0.158560000  |
| 1 | 6.141660000  | 2.697325000  | 2.192696000  |
| 1 | 4.642744000  | 1.785308000  | 2.333021000  |
| 1 | 6.089591000  | 1.237576000  | 3.201284000  |
| 1 | 7.212724000  | -1.024502000 | -0.272995000 |
| 1 | 8.058765000  | 0.243252000  | -1.143058000 |
| 1 | 7.670827000  | 2.785876000  | 0.636980000  |
| 1 | 9.073281000  | 1.876351000  | 0.099078000  |
| 1 | 10.127906000 | -0.201464000 | 0.143985000  |
| 1 | 9.193607000  | -0.739900000 | 2.091070000  |
| 1 | 10.583521000 | -2.559410000 | -0.443449000 |
| 1 | 8.859116000  | -2.828099000 | -0.772607000 |
| 1 | 10.374604000 | -4.201746000 | -1.985947000 |
| 1 | 10.983962000 | -5.537070000 | -3.952759000 |
| 1 | 10.645603000 | -2.065442000 | -6.453131000 |
| 1 | 10.025217000 | -0.709186000 | -4.469661000 |
| 1 | 11.477653000 | -5.768282000 | -6.284087000 |
| 1 | 10.409713000 | -4.782693000 | -7.291457000 |
| 1 | 12.100099000 | -4.321674000 | -7.090373000 |
| 1 | 8.301812000  | 2.292839000  | 3.025000000  |
| 1 | 10.447242000 | 1.343536000  | 3.233506000  |
| 1 | 10.589551000 | 3.428537000  | 1.338612000  |
| 1 | 9.213726000  | 4.356872000  | 2.004819000  |
| 1 | 11.186920000 | 5.640005000  | 1.740015000  |
| 1 | 12.781671000 | 7.412323000  | 2.318441000  |
| 1 | 13.441778000 | 5.606529000  | 6.155353000  |
| 1 | 11.831527000 | 3.811509000  | 5.578539000  |
| 1 | 14.394169000 | 8.412683000  | 3.782829000  |
| 1 | 13.833906000 | 8.371675000  | 5.459390000  |
| 1 | 15.176162000 | 7.343691000  | 4.956093000  |
| 1 | 6.856873000  | -3.525194000 | -3.228045000 |
| 1 | 6.016873000  | -4.832949000 | -2.370875000 |
| 1 | 6.850938000  | -3.576924000 | -1.461389000 |



|   |              |              |              |
|---|--------------|--------------|--------------|
| 1 | 5.087032000  | -7.873524000 | 1.703911000  |
| 1 | 5.971319000  | -8.013166000 | -0.581183000 |
| 1 | 7.306153000  | -7.955028000 | 0.562535000  |
| 1 | 6.875843000  | -6.508812000 | -0.382717000 |
| 1 | 4.089629000  | -5.952580000 | 3.071896000  |
| 1 | 5.264001000  | -6.758781000 | 4.115117000  |
| 1 | 6.250937000  | -4.605602000 | 4.751349000  |
| 1 | 6.123650000  | -3.530490000 | 2.808153000  |
| 1 | 3.258842000  | -4.139931000 | 4.658762000  |
| 1 | 3.999057000  | -5.369506000 | 5.722407000  |
| 1 | 7.796126000  | -7.177812000 | 2.381249000  |
| 1 | 7.510035000  | -6.054791000 | 3.691804000  |
| 1 | 2.038227000  | -4.425835000 | 6.614067000  |
| 1 | 0.591581000  | -3.660243000 | 8.440689000  |
| 1 | 3.582732000  | -0.837486000 | 9.665943000  |
| 1 | 5.050579000  | -1.606691000 | 7.819419000  |
| 1 | 0.117035000  | -2.254440000 | 10.317888000 |
| 1 | 1.539814000  | -1.894472000 | 11.304221000 |
| 1 | 0.861926000  | -0.651353000 | 10.252920000 |
| 1 | 8.185641000  | -5.130104000 | 0.871680000  |
| 1 | 8.518082000  | -3.147051000 | 2.086459000  |
| 1 | 9.974953000  | -5.492958000 | 3.335301000  |
| 1 | 10.056971000 | -6.411561000 | 1.804943000  |
| 1 | 12.232558000 | -6.442118000 | 2.415204000  |
| 1 | 14.675135000 | -6.223305000 | 2.579758000  |
| 1 | 14.408474000 | -2.078588000 | 1.497001000  |
| 1 | 11.925604000 | -2.277304000 | 1.416193000  |
| 1 | 16.744223000 | -4.913966000 | 1.828085000  |
| 1 | 16.590818000 | -3.168832000 | 1.536181000  |
| 1 | 16.552130000 | -3.802485000 | 3.185411000  |
| 1 | 3.460946000  | -6.027645000 | 1.219061000  |
| 1 | 3.786754000  | -7.122141000 | -0.131865000 |
| 1 | 3.974259000  | -2.642943000 | 1.006426000  |
| 1 | 5.565810000  | -3.098415000 | 0.417604000  |
| 6 | 0.470881000  | 1.201626000  | -5.121857000 |
| 8 | 0.195721000  | 0.987134000  | -6.291397000 |
| 8 | 1.742642000  | 1.149034000  | -4.610592000 |
| 6 | 2.797648000  | 0.933100000  | -5.567610000 |
| 6 | 3.879871000  | 0.102834000  | -4.889830000 |
| 6 | 3.264249000  | 2.299873000  | -6.093876000 |
| 8 | 4.354974000  | 2.178920000  | -6.997007000 |
| 8 | 4.441730000  | 0.745394000  | -3.739475000 |
| 6 | 6.602416000  | 1.317633000  | -4.765205000 |
| 6 | 7.719558000  | 2.155301000  | -4.749838000 |
| 6 | 7.852892000  | 3.211348000  | -3.836136000 |
| 6 | 6.801419000  | 3.397120000  | -2.927292000 |
| 6 | 5.672509000  | 2.578572000  | -2.932061000 |

|   |              |              |              |
|---|--------------|--------------|--------------|
| 6 | 5.559378000  | 1.528925000  | -3.849459000 |
| 6 | 9.096981000  | 4.119488000  | -3.889039000 |
| 6 | 9.023475000  | 4.938468000  | -5.202632000 |
| 6 | 9.128888000  | 5.126016000  | -2.712786000 |
| 6 | 11.560668000 | 3.613635000  | -4.494722000 |
| 6 | 12.735543000 | 2.881531000  | -4.343348000 |
| 6 | 12.771408000 | 1.775649000  | -3.487531000 |
| 6 | 11.616865000 | 1.413509000  | -2.788424000 |
| 6 | 10.450746000 | 2.163058000  | -2.953312000 |
| 6 | 10.386204000 | 3.274399000  | -3.803623000 |
| 8 | 13.964118000 | 1.103183000  | -3.409785000 |
| 6 | 14.072052000 | -0.011436000 | -2.518973000 |
| 6 | 15.512876000 | -0.501590000 | -2.632858000 |
| 8 | 16.420040000 | 0.581948000  | -2.432953000 |
| 6 | 15.864136000 | -1.536323000 | -1.562418000 |
| 8 | 15.842381000 | -0.956419000 | -0.266143000 |
| 1 | 2.403667000  | 0.348354000  | -6.405022000 |
| 1 | 3.442643000  | -0.826409000 | -4.516796000 |
| 1 | 4.642824000  | -0.150382000 | -5.630668000 |
| 1 | 2.433210000  | 2.748257000  | -6.646602000 |
| 1 | 3.500582000  | 2.955573000  | -5.245952000 |
| 1 | 5.174613000  | 2.236836000  | -6.479528000 |
| 1 | 6.578617000  | 0.483166000  | -5.458543000 |
| 1 | 8.521803000  | 1.956920000  | -5.455848000 |
| 1 | 6.843922000  | 4.199645000  | -2.198635000 |
| 1 | 4.861481000  | 2.739082000  | -2.228525000 |
| 1 | 9.813783000  | 5.695557000  | -5.251812000 |
| 1 | 9.108389000  | 4.297920000  | -6.086348000 |
| 1 | 8.063099000  | 5.461471000  | -5.257183000 |
| 1 | 10.045583000 | 5.722130000  | -2.766460000 |
| 1 | 9.122161000  | 4.613954000  | -1.744421000 |
| 1 | 8.278341000  | 5.817029000  | -2.747352000 |
| 1 | 11.573326000 | 4.462480000  | -5.170529000 |
| 1 | 13.633957000 | 3.150971000  | -4.890857000 |
| 1 | 11.594000000 | 0.542593000  | -2.144764000 |
| 1 | 9.561661000  | 1.848149000  | -2.415652000 |
| 1 | 13.861824000 | 0.301524000  | -1.489149000 |
| 1 | 13.368891000 | -0.803575000 | -2.807211000 |
| 1 | 15.659550000 | -0.943889000 | -3.631103000 |
| 1 | 16.035594000 | 1.344870000  | -2.897169000 |
| 1 | 15.142208000 | -2.359190000 | -1.561285000 |
| 1 | 16.856959000 | -1.951837000 | -1.791970000 |
| 1 | 16.344491000 | -0.126804000 | -0.355073000 |

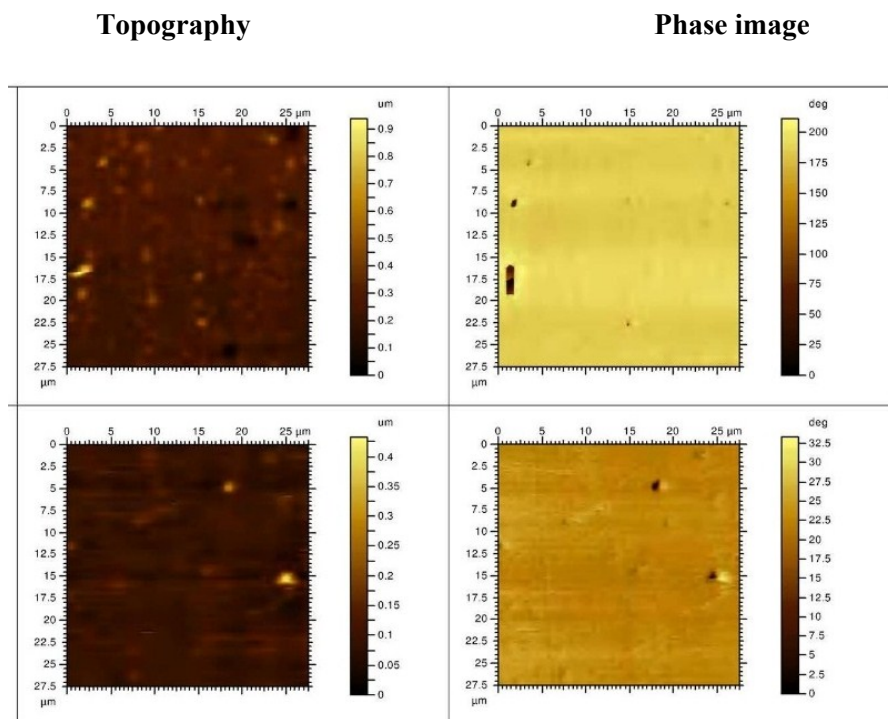

**SI 10** Topography and phase images of EUH-1 and EUH-2 hybrids. The AFM images show the existence of single phase as there is no color variation in the mapped area.

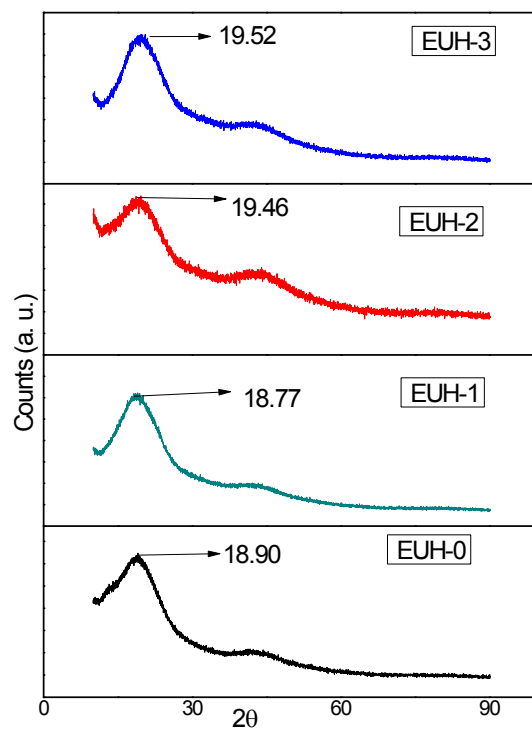

**SI 11** Wide angle X-ray diffractograms of EUH-0, EUH-1, EUH-2 and EUH-3 hybrids.

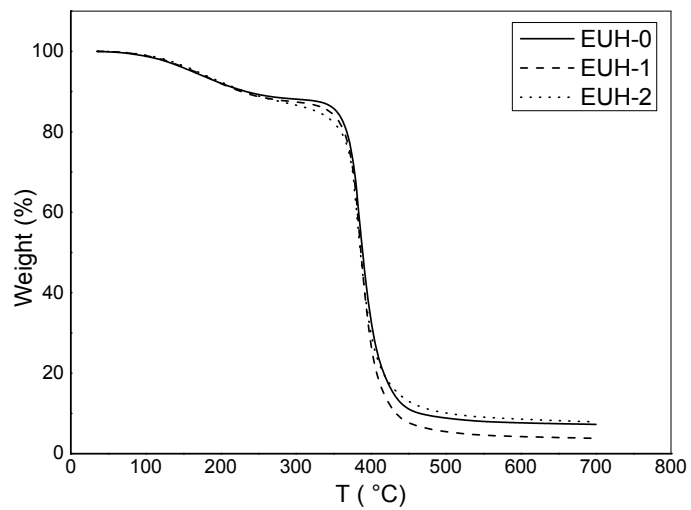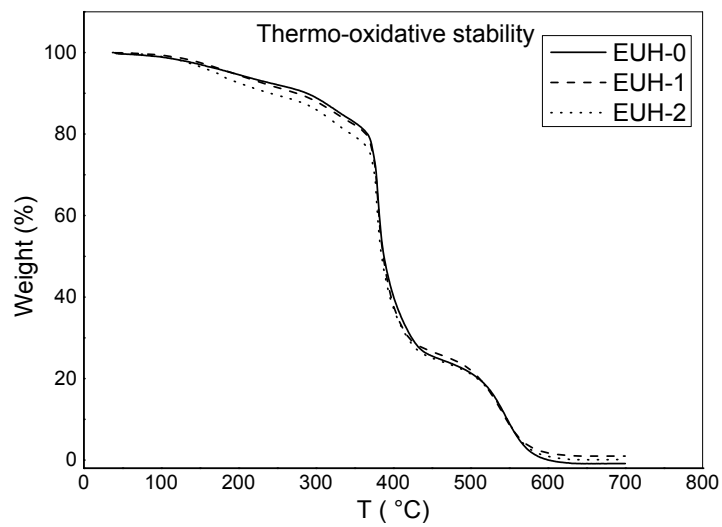

**SI 12 TGA profiles of EUH networks under nitrogen (top) and oxidative environments (bottom).**
